# Supplementary material for: Circulation responses to surface heating and implications for polar amplification
Source: Copernicus journal article supplement (doi:10.5194/egusphere-2023-3066), 2024-01-04
Supplement: Supplementary file 1 [file egusphere-2023-3066-supplement.pdf]

# Supporting Information for "Circulation responses to surface heating and implications for polar amplification"

Peter Yu Feng Siew<sup>1</sup>, Camille Li<sup>2,3,1</sup>, Stefan Pieter Sobolowski<sup>2,3,4</sup>, Etienne Dunn-Sigouin<sup>4,3</sup>, and Mingfang Ting<sup>1,5</sup>

<sup>1</sup>Lamont-Doherty Earth Observatory, Columbia University, Palisades, NY, USA

<sup>2</sup>Geophysical Institute, University of Bergen, Bergen, Norway

<sup>3</sup>Bjerknes Centre for Climate Research, Bergen, Norway

<sup>4</sup>NORCE, Bergen, Norway

<sup>5</sup>Columbia Climate School, Columbia University, New York, NY, USA

**Correspondence:** Peter Yu Feng Siew (pyfsiew@ldeo.columbia.edu)

## Contents of this file

1. Figures S1-S5
2. SI references

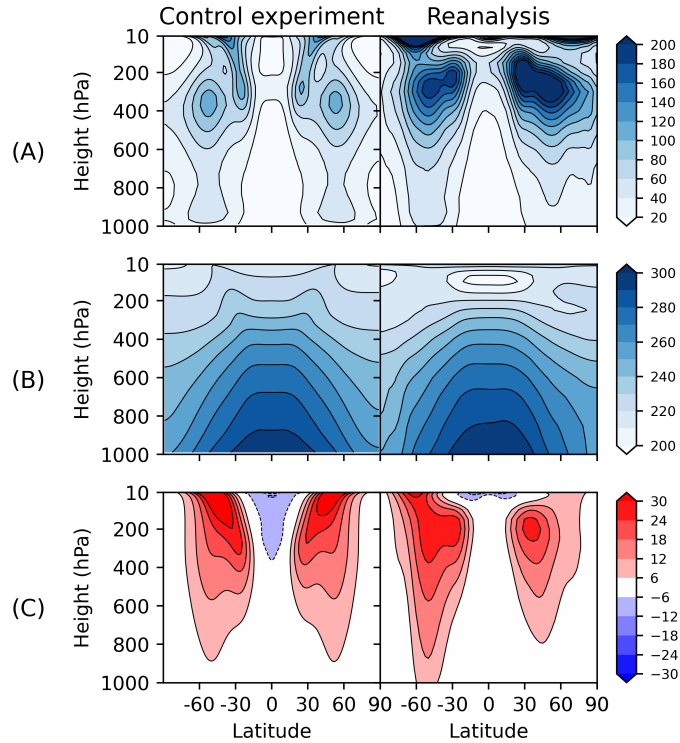

**Figure S1.** Annual, zonal mean of the (A) transient eddy kinetic energy ( $\text{m}^2\text{s}^{-2}$ ), (B) air temperature (K) and (C) zonal wind ( $\text{ms}^{-1}$ ) for the control experiment (years 20-50; left column) and NCEP-DOE reanalysis 2 (years 1980-2010; right column) (Kanamitsu et al., 2002). The vertical axis shows the height; horizontal axis shows the latitude. The transient eddy kinetic energy is calculated as  $\frac{1}{2}(u'^2 + v'^2)$ , where  $u$  is the zonal wind,  $v$  is the meridional wind and prime ( $'$ ) is the daily deviation from climatology (equation 5.1 in James, 1995).

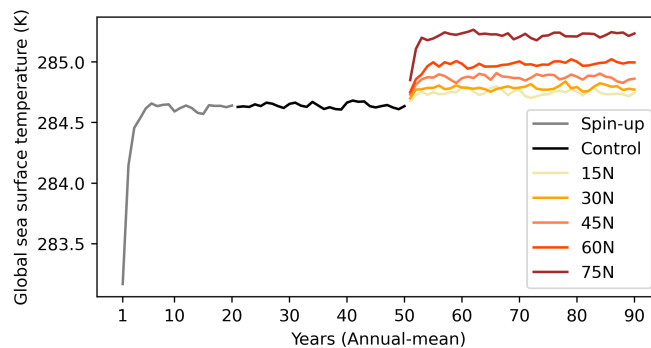

**Figure S2.** The temporal evolution of global, annual mean sea surface temperature (K) in the periods of spin-up (years 1 to 20), control (years 20 to 50) and the perturbation experiments (years 50 to 90). The perturbation experiments are branched off from the last day of year 50 from the control experiment. The first 10 years (years 50 to 60) from the perturbation experiments are discarded.

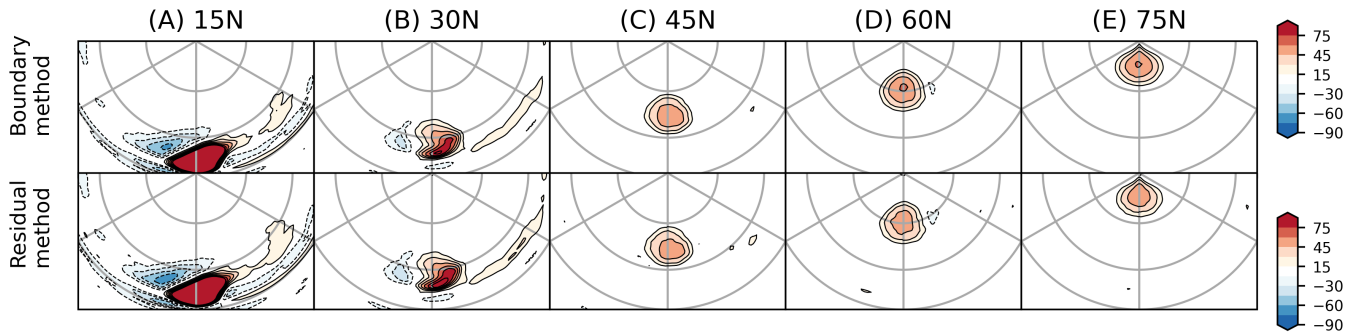

**Figure S3.** The column integrated diabatic heating response ( $\text{Wm}^{-2}$ ) calculated by the boundary (top row) and residual methods (bottom row) in the (A) 15°N, (B) 30°N, (C) 45°N, (D) 60°N and (E) 75°N heating perturbation experiments. The column integrated diabatic heating using the boundary method is equal to  $R_t - R_s + H_s + LP$ , where  $R_t$  is the net radiative fluxes at the top of the atmosphere,  $R_s$  is the net radiative fluxes on the surface,  $H_s$  is the surface sensible heat flux,  $L$  ( $=2.26 \times 10^6 \text{ Jkg}^{-1}$ ) is the latent heat of evaporation and  $P$  is the precipitation rate (see Equation 5 in Trenberth and Solomon, 1994). The column integrated diabatic heating using the residual method is equal to  $\frac{C_p}{g} \int_{1000\text{hPa}}^{0\text{hPa}} \bar{Q} dp$ , where  $C_p$  ( $=1004 \text{ JK}^{-1}\text{kg}^{-1}$ ) is the specific heat capacity of air at a constant pressure,  $g$  ( $=9.8 \text{ ms}^{-2}$ ) is gravity of Earth,  $p$  is the pressure, and  $\bar{Q}$  is the time-mean diabatic heating obtained as the residual from the thermodynamic equation (Equation 2 in the main text).

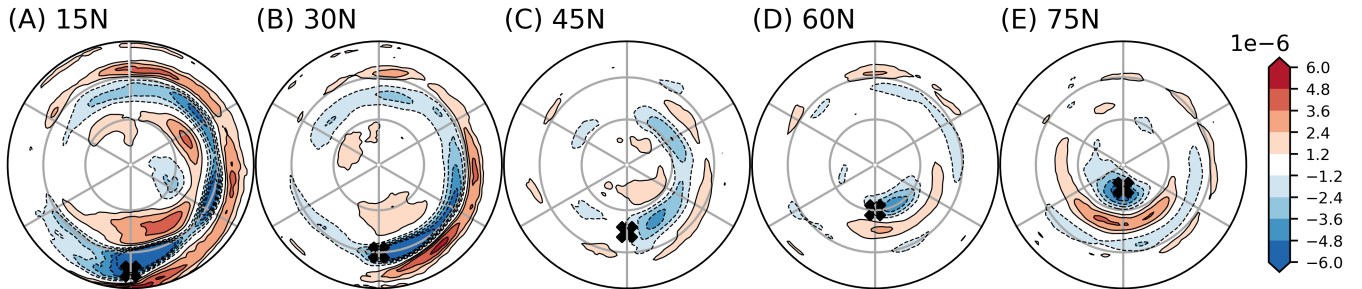

**Figure S4.** Upper level (232 hPa) vorticity response ( $\text{s}^{-1}$ ) in the (A) 15°N, (B) 30°N, (C) 45°N, (D) 60°N and (E) 75°N heating perturbation experiments. The crosses mark the position of the surface heating perturbation. The latitude lines mark 30°N and 60°N. The longitude lines denote 60° intervals, marking 120°W, 60°W, 0°, 60°E, 120°E and 180°.

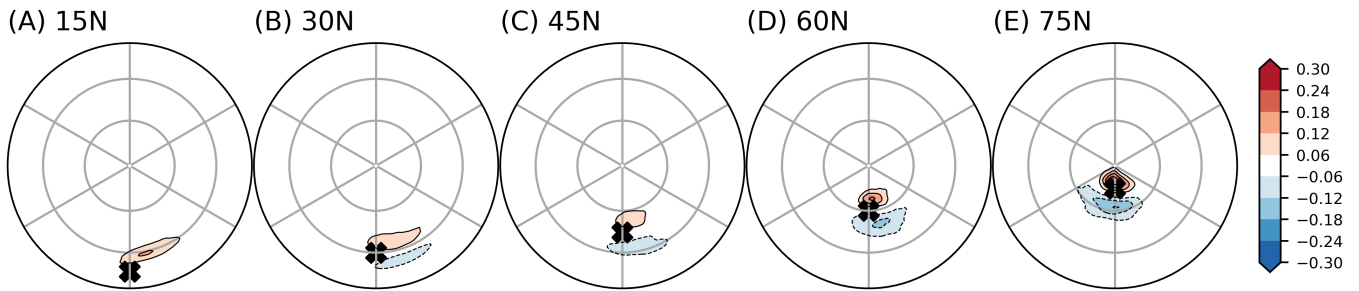

**Figure S5.** 780 hPa Eady growth rate maximum response ( $\text{day}^{-1}$ ) in the (A) 15°N, (B) 30°N, (C) 45°N, (D) 60°N and (E) 75°N heating perturbation experiments. The crosses mark the position of surface heating perturbation. The Eady growth rate is calculated as  $0.31|f|\left|\frac{du}{dz}\right|N^{-1}$ , where  $f$  is planetary vorticity,  $N$  is the Brunt-väisälä frequency and  $\frac{du}{dz}$  is the vertical zonal wind shear (Hoskins and Valdes, 1990; Simmonds and Lim, 2009). The crosses mark the position of the surface heating perturbation. The latitude lines mark 30°N and 60°N. The longitude lines denote 60° intervals, marking 120°W, 60°W, 0°, 60°E, 120°E and 180°.

## References

- 5 Hoskins, B. J. and Valdes, P. J.: On the existence of storm-tracks, *Journal of Atmospheric Sciences*, 47, 1854–1864, [https://doi.org/10.1175/1520-0469\(1990\)047<1854:OTEOST>2.0.CO;2](https://doi.org/10.1175/1520-0469(1990)047<1854:OTEOST>2.0.CO;2), 1990.
- James, I. N.: Introduction to circulating atmospheres, Cambridge University Press, <https://doi.org/10.1017/CBO9780511622977>, 1995.
- Kanamitsu, M., Ebisuzaki, W., Woollen, J., Yang, S.-K., Hnilo, J., Fiorino, M., and Potter, G.: Ncep–doe amip-ii reanalysis (r-2), *Bulletin of the American Meteorological Society*, 83, 1631–1644, <https://doi.org/10.1175/BAMS-83-11-1631>, 2002.
- 10 Simmonds, I. and Lim, E.-P.: Biases in the calculation of Southern Hemisphere mean baroclinic eddy growth rate, *Geophysical Research Letters*, 36, <https://doi.org/10.1029/2008GL036320>, 2009.
- Trenberth, K. E. and Solomon, A.: The global heat balance: Heat transports in the atmosphere and ocean, *Climate Dynamics*, 10, 107–134, <https://doi.org/10.1007/BF00210625>, 1994.
